# Supplementary material
Source: publisher figshare collection journal article supplement (https://rs.figshare.com/ndownloader/files/14949449)
Supplement: Supplementary file 1 [file 14949449]

Supplementary material for R. J. C. Dixey, F. Orlandi, P. Manuel,  
P. Mukherjee, S. E. Dutton and P. J. Saines, 2019, Emergent  
magnetic order and correlated disorder in formate metal-organic  
frameworks, Phil. Trans. R. Soc. A. doi: 10.1098/rsta.[paper ID in  
form xxxx.xxxx e.g. 10.1098/rsta.2014.0049]

### Neutron diffraction experimental details

Tb(DCO<sub>2</sub>)<sub>3</sub> was loaded into an 8 mm copper can and sealed with indium wire, under a helium atmosphere. Measurements were carried out between 0.28 K to 1.95 K, with the sample cooled using a <sup>3</sup>He Heliox sorption refrigerator. Ln(DCO<sub>2</sub>)<sub>3</sub> (where Ln = Ce, Pr, Nd, Dy, Ho and Er) samples were loaded into 8 mm vanadium cans. Measurements were carried out between 1.6 K to 100 K, with the samples cooled using the standard Oxford Instruments WISH cryostat. Average structure neutron patterns were fitted in FULLPROF [46] using the Rietveld method. The aluminium and copper sample environment peaks were fitted with a Le Bail method. A linear interpolation of points were used to fit the background and using a profile function built from a convolution of back-to-back exponentials with a pseudo-Voigt function TOF to fit the peak shapes. To isolate the total magnetic contribution to the neutron-scattering data, data collected at a high temperature T<sub>high</sub> were subtracted from the low-temperature data of interest, where T<sub>high</sub> = 20 K. Banks were merged over a Q range of 0.2 to 3.75 Å<sup>-1</sup> to improve statistics, areas with Bragg peak contamination excised and binned. The data were placed on an absolute intensity scale (barn sr<sup>-1</sup> Ln<sup>-1</sup>) by normalisation to the calculated nuclear Bragg profile at T<sub>high</sub>. Diffuse neutron patterns were fitted with the reverse monte carlo program - SPINVERT, [40] using a supercell of 52 x 54 x 55 Å<sup>3</sup> or 5 x 5 x 13 unit cells.

### Physical property measurements experimental details

Heat capacity measurements were measured on a Quantum Design PPMS DynaCool with 14 T superconducting magnet and <sup>3</sup>He insert, between 400 mK and 14 K. Samples were ground into a powder, mixed with an equal amount of powdered silver, to improve heat transfer, and pressed into a pellet. Addenda measurements were taken to allow for subtraction after measurement of the sample. To isolate the magnetic contribution to the heat capacity, the addenda, lattice (calculated from the Einstein-Debye equations), and the silver (interpolation of literature data) contributions were subtracted. [53] The 400 mK - 30 K magnetic measurements of the polycrystalline samples were performed using a Quantum Design MPMS SQUID magnetometer, with a <sup>3</sup>He insert in a 100 Oe DC magnetic field.

### Appendix 1: Experimental Method Appendix

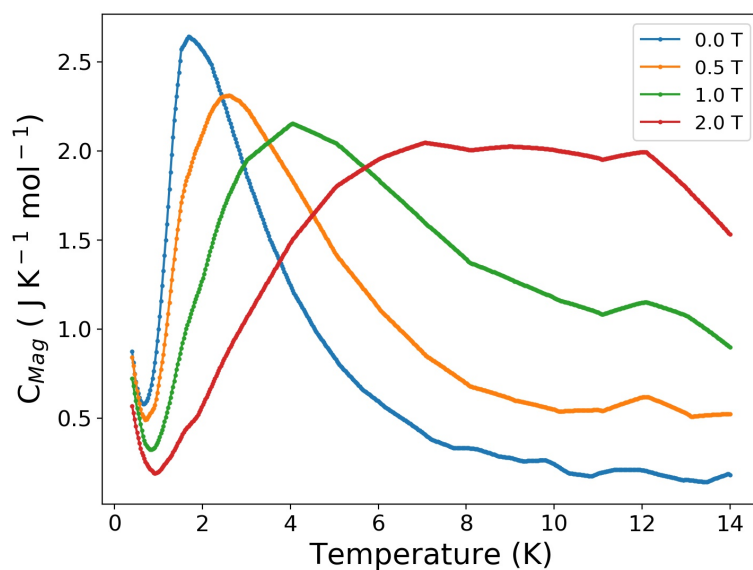

Supplementary Figure 1:  $\text{Tb}(\text{HCO}_2)_3$  magnetic heat capacity -  $C_{mag}$  in variable fields

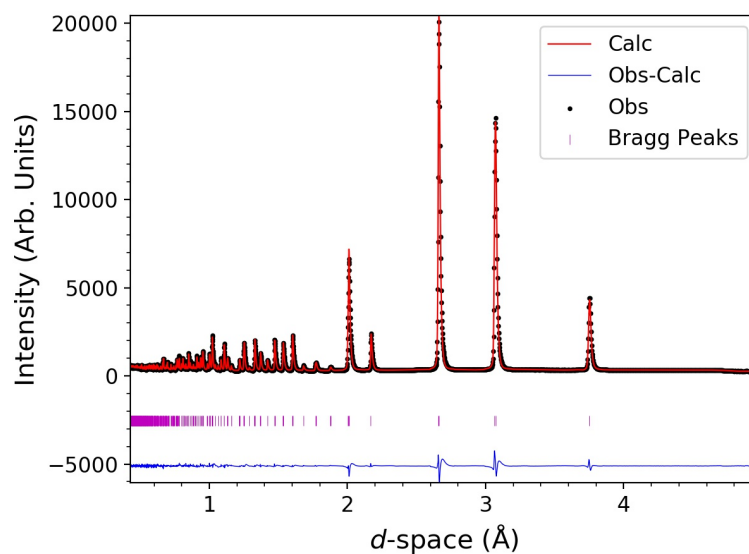

Supplementary Figure 2: Powder neutron diffraction pattern of  $\text{Ce}(\text{DCO}_2)_3$  at 1.5 K using bank 5+6 of the WISH diffractometer, fitted using the Rietveld method with the  $R\bar{3}m$  space group.  $R_p$  and  $R_{wp}$  of 4.71 % and 6.21 % are obtained, respectively from the refinement. Unit cell parameters:  $a = b = 10.3905(32)$ ,  $c = 4.11018(16)$  Å and a unit cell volume of  $404.218(23)$  Å<sup>3</sup>. Black marks, red line, blue line indicate experimentally observed intensities, calculated intensities and difference respectively.

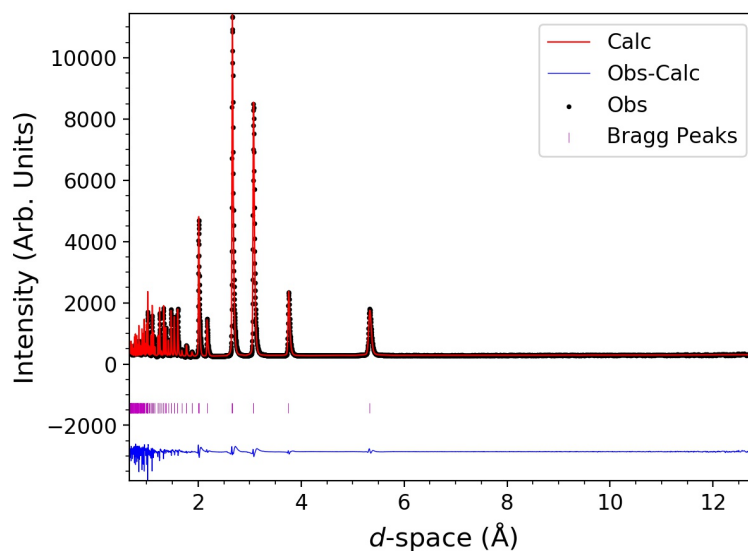

Supplementary Figure 3: Powder neutron diffraction pattern of  $\text{Ce}(\text{DCO}_2)_3$  at 1.5 K using bank 2+9 of the WISH diffractometer, fitted using the Rietveld method with the  $R\bar{3}m$  space group.  $R_p$  and  $R_{wp}$  of 7.05% and 5.73 % are obtained, respectively from the refinement. Unit cell parameters:  $a = b = 10.3905(32)$ ,  $c = 4.11018(16)$  Å and a unit cell volume of  $404.218(23)$  Å<sup>3</sup>. Black marks, red line, blue line indicate experimentally observed intensities, calculated intensities and difference respectively.

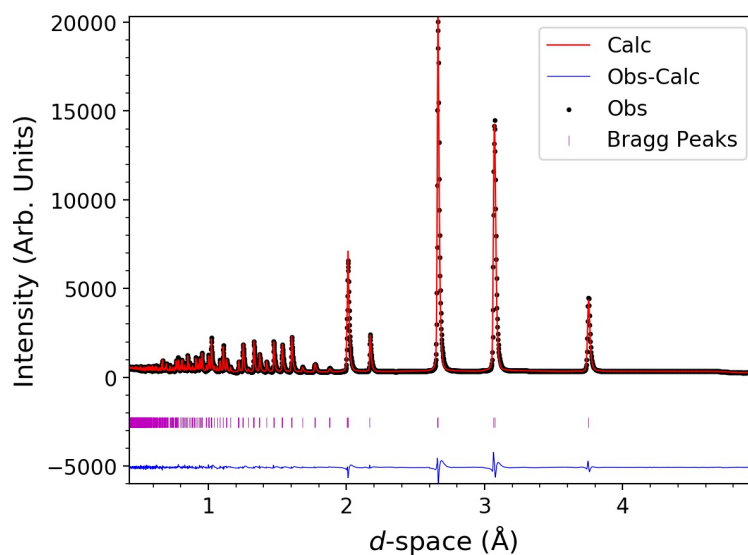

Supplementary Figure 4: Powder neutron diffraction pattern of  $\text{Ce}(\text{DCO}_2)_3$  at 50 K using bank 5+6 of the WISH diffractometer, fitted using the Rietveld method with the  $R\bar{3}m$  space group.  $R_p$  and  $R_{wp}$  of 4.57% and 6.11 % are obtained, respectively from the refinement. Unit cell parameters:  $a = b = 10.65754(13)$ ,  $c = 4.11018(55)$  Å and a unit cell volume of  $404.275(89)$  Å<sup>3</sup>. Black marks, red line, blue line indicate experimentally observed intensities, calculated intensities and difference respectively.

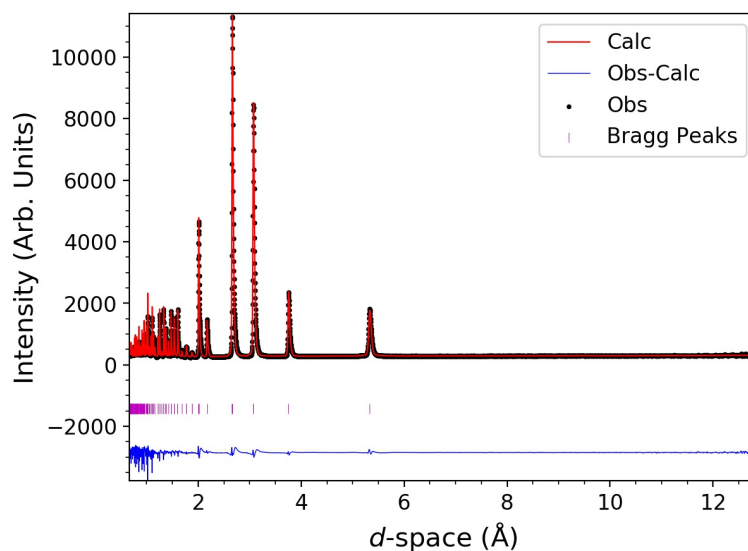

Supplementary Figure 5: Powder neutron diffraction pattern of  $\text{Ce}(\text{DCO}_2)_3$  at 50 K using bank 2+9 of the WISH diffractometer, fitted using the Rietveld method with the  $R\bar{3}m$  space group.  $R_p$  and  $R_{wp}$  of 6.97% and 5.71 % are obtained, respectively from the refinement. Unit cell parameters:  $a = b = 10.65754(13)$ ,  $c = 4.11018(55)$  Å and a unit cell volume of  $404.275(89)$  Å<sup>3</sup>. Black marks, red line, blue line indicate experimentally observed intensities, calculated intensities and difference respectively.

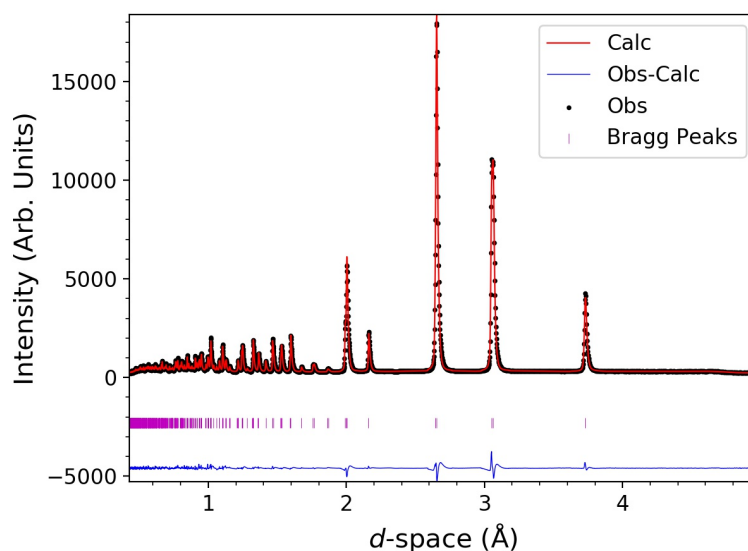

Supplementary Figure 6: Powder neutron diffraction pattern of  $\text{Pr}(\text{DCO}_2)_3$  at 1.5 K using bank 5+6 of the WISH diffractometer, fitted using the Rietveld method with the  $R\bar{3}m$  space group.  $R_p$  and  $R_{wp}$  of 4.60 % and 5.83 % are obtained, respectively from the refinement. Unit cell parameters:  $a = b = 10.61446(36)$ ,  $c = 4.08233(18)$  Å and a unit cell volume of  $398.322(26)$  Å<sup>3</sup>. Black marks, red line, blue line indicate experimentally observed intensities, calculated intensities and difference respectively.

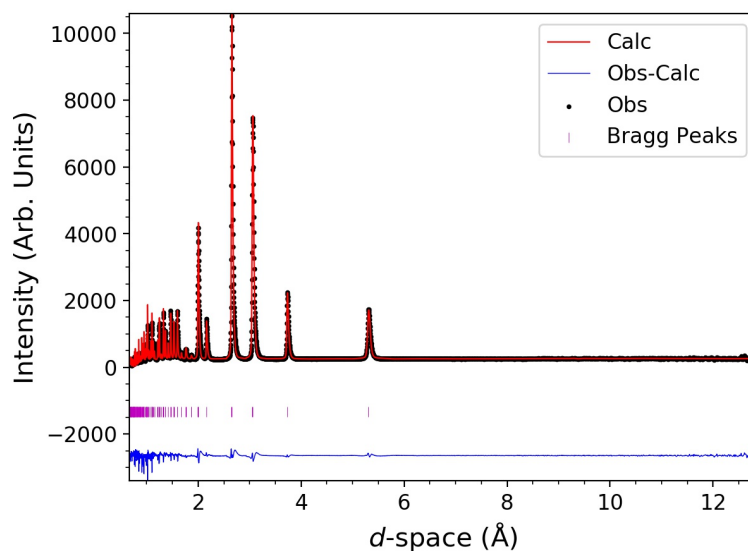

Supplementary Figure 7: Powder neutron diffraction pattern of  $\text{Pr}(\text{DCO}_2)_3$  at 1.5 K using bank 2+9 of the WISH diffractometer, fitted using the Rietveld method with the  $R\bar{3}m$  space group.  $R_p$  and  $R_{wp}$  of 8.25 % and 6.67 % are obtained, respectively from the refinement. Unit cell parameters:  $a = b = 10.61446(36)$ ,  $c = 4.08233(18)$  Å and a unit cell volume of  $398.322(26)$  Å<sup>3</sup>. Black marks, red line, blue line indicate experimentally observed intensities, calculated intensities and difference respectively.

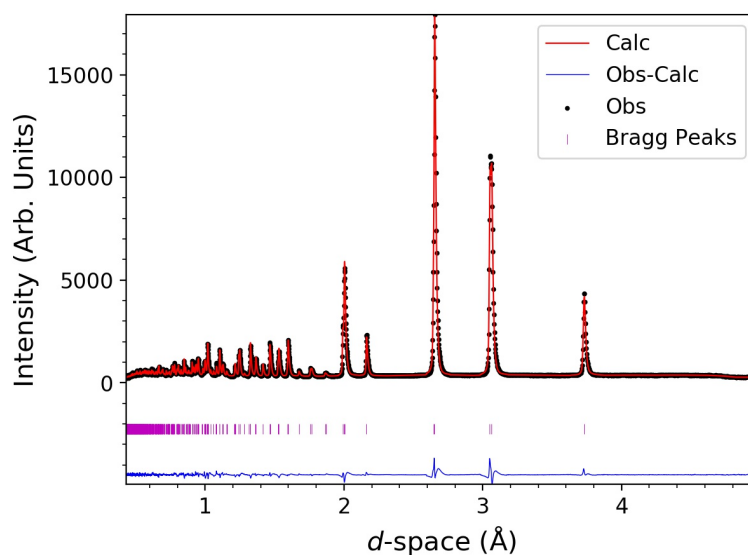

Supplementary Figure 8: Powder neutron diffraction pattern of  $\text{Pr}(\text{DCO}_2)_3$  at 150 K using bank 5+6 of the WISH diffractometer, fitted using the Rietveld method with the  $R\bar{3}m$  space group.  $R_p$  and  $R_{wp}$  of 4.57 % and 5.91 % are obtained, respectively from the refinement. Unit cell parameters:  $a = b = 10.61885(38)$ ,  $c = 4.08246(18)$  Å and a unit cell volume of  $398.322(26)$  Å<sup>3</sup>. Black marks, red line, blue line indicate experimentally observed intensities, calculated intensities and difference respectively.

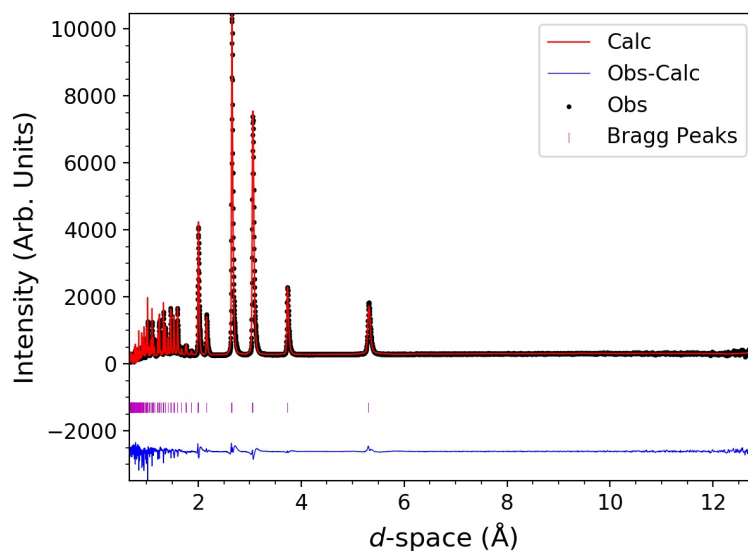

Supplementary Figure 9: Powder neutron diffraction pattern of  $\text{Pr}(\text{DCO}_2)_3$  at 150 K using bank 2+9 of the WISH diffractometer, fitted using the Rietveld method with the  $R\bar{3}m$  space group.  $R_p$  and  $R_{wp}$  of 8.25 % and 5.93 % are obtained, respectively from the refinement. Unit cell parameters:  $a = b = 10.61885(38)$ ,  $c = 4.08246(18)$  Å and a unit cell volume of  $398.322(26)$  Å<sup>3</sup>. Black marks, red line, blue line indicate experimentally observed intensities, calculated intensities and difference respectively.

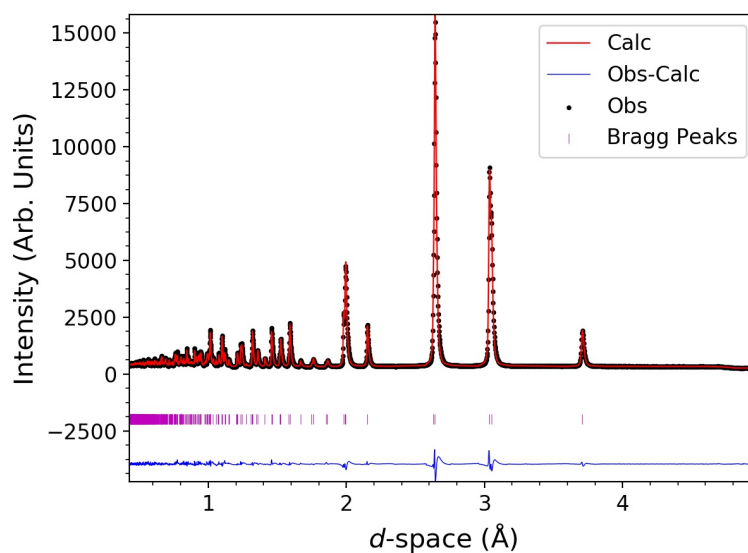

Supplementary Figure 10: Powder neutron diffraction pattern of  $\text{Nd}(\text{DCO}_2)_3$  at 1.5 K using bank 5+6 of the WISH diffractometer, fitted using the Rietveld method with the  $R\bar{3}m$  space group.  $R_p$  and  $R_{wp}$  of 4.12 % and 5.37 % are obtained, respectively from the refinement. Unit cell parameters:  $a = b = 10.57028(42)$ ,  $c = 4.05726(19)$  Å and a unit cell volume of  $392.587(29)$  Å<sup>3</sup>. Black marks, red line, blue line indicate experimentally observed intensities, calculated intensities and difference respectively.

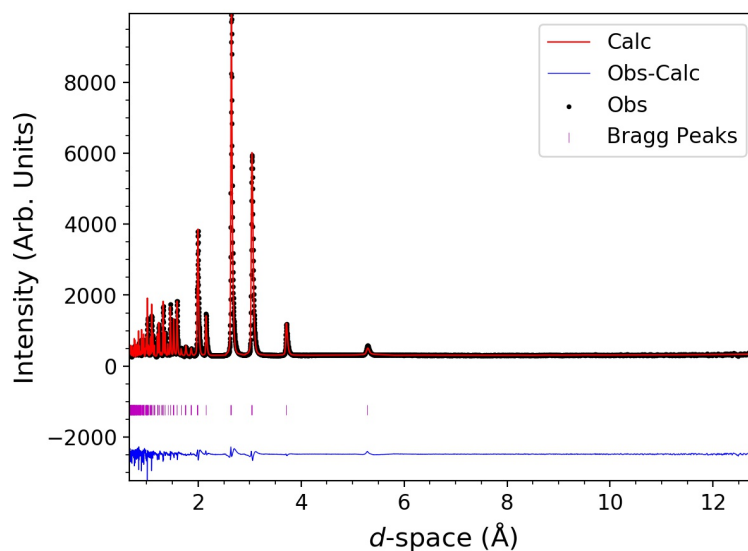

Supplementary Figure 11: Powder neutron diffraction pattern of  $\text{Nd}(\text{DCO}_2)_3$  at 1.5 K using bank 2+9 of the WISH diffractometer, fitted using the Rietveld method with the  $R\bar{3}m$  space group.  $R_p$  and  $R_{wp}$  of 5.88 % and 5.16 % are obtained, respectively from the refinement. Unit cell parameters:  $a = b = 10.61885(38)$ ,  $c = 4.08246(18)$  Å and a unit cell volume of  $392.587(29)$  Å<sup>3</sup>. Black marks, red line, blue line indicate experimentally observed intensities, calculated intensities and difference respectively.

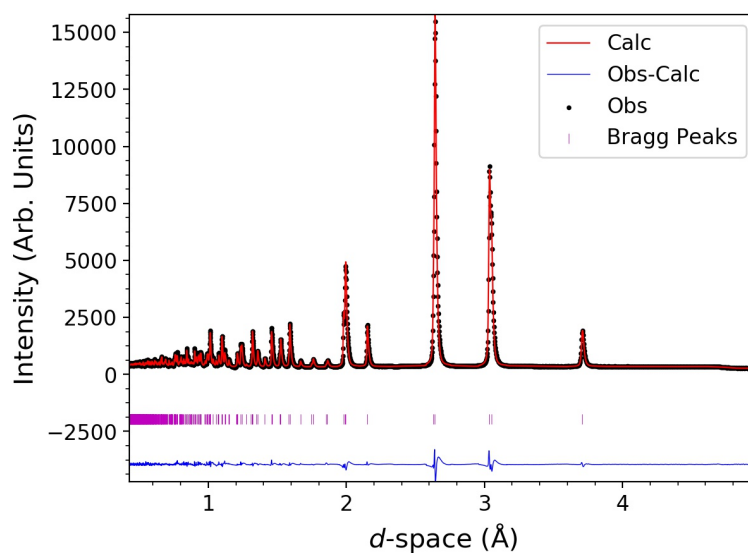

Supplementary Figure 12: Powder neutron diffraction pattern of  $\text{Nd}(\text{DCO}_2)_3$  at 50 K using bank 5+6 of the WISH diffractometer, fitted using the Rietveld method with the  $R\bar{3}m$  space group.  $R_p$  and  $R_{wp}$  of 4.04 % and 5.33 % are obtained, respectively from the refinement. Unit cell parameters:  $a = b = 10.57053(42)$ ,  $c = 4.05726(19)$  Å and a unit cell volume of  $392.606(26)$  Å<sup>3</sup>. Black marks, red line, blue line indicate experimentally observed intensities, calculated intensities and difference respectively.

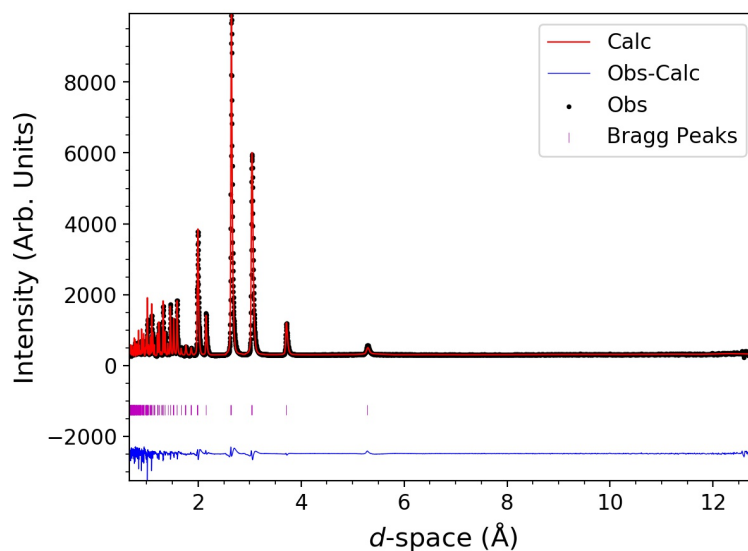

Supplementary Figure 13: Powder neutron diffraction pattern of  $\text{Nd}(\text{DCO}_2)_3$  at 50 K using bank 2+9 of the WISH diffractometer, fitted using the Rietveld method with the  $R3m$  space group.  $R_p$  and  $R_{wp}$  of 5.97 % and 5.15 % are obtained, respectively from the refinement. Unit cell parameters:  $a = b = 10.57053(42)$ ,  $c = 4.05726(19)$  Å and a unit cell volume of  $392.606(26)$  Å<sup>3</sup>. Black marks, red line, blue line indicate experimentally observed intensities, calculated intensities and difference respectively.

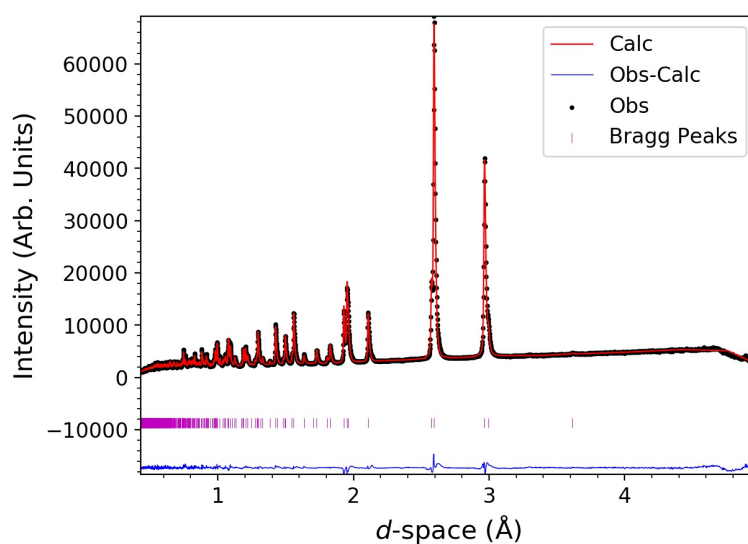

Supplementary Figure 14: Powder neutron diffraction pattern of  $\text{Dy}(\text{DCO}_2)_3$  at 1.5 K using bank 5+6 of the WISH diffractometer, fitted using the Rietveld method with the  $R3m$  space group.  $R_p$  and  $R_{wp}$  of 3.04 % and 3.56 % are obtained, respectively from the refinement. Unit cell parameters:  $a = b = 10.39048(39)$ ,  $c = 3.95540(16)$  Å and a unit cell volume of  $369.821(24)$  Å<sup>3</sup>. Black marks, red line, blue line indicate experimentally observed intensities, calculated intensities and difference respectively.



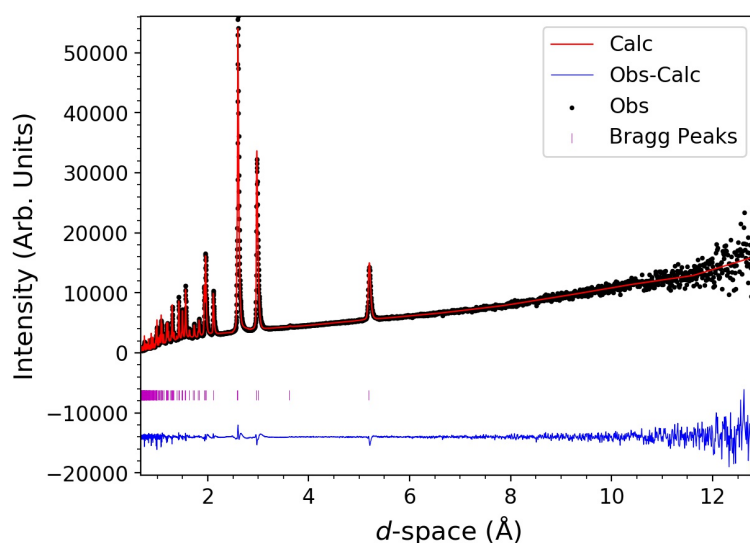

Supplementary Figure 15: Powder neutron diffraction pattern of  $\text{Dy}(\text{DCO}_2)_3$  at 1.5 K using bank 2+9 of the WISH diffractometer, fitted using the Rietveld method with the  $R3m$  space group.  $R_p$  and  $R_{wp}$  of 4.86 % and 4.06 % are obtained, respectively from the refinement. Unit cell parameters:  $a = b = 10.39048(39)$ ,  $c = 3.95540(16)$  Å and a unit cell volume of  $369.821(24)$  Å<sup>3</sup>. Black marks, red line, blue line indicate experimentally observed intensities, calculated intensities and difference respectively.

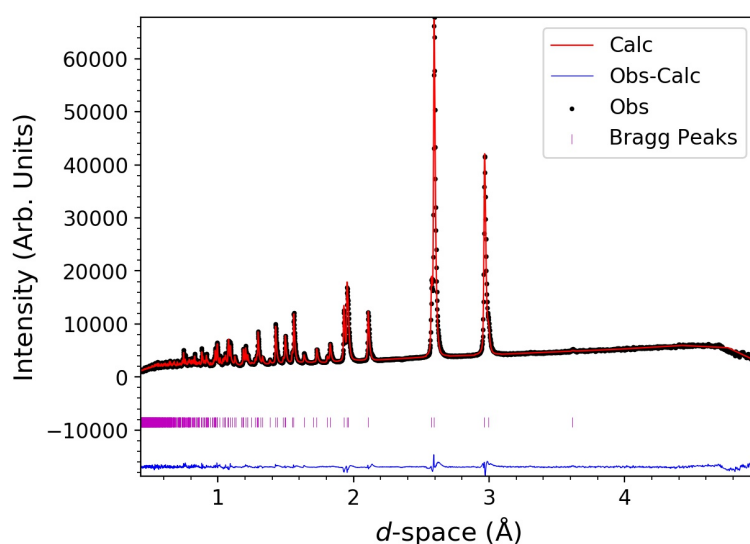

Supplementary Figure 16: Powder neutron diffraction pattern of  $\text{Dy}(\text{DCO}_2)_3$  at 100 K using bank 5+6 of the WISH diffractometer, fitted using the Rietveld method with the  $R3m$  space group.  $R_p$  and  $R_{wp}$  of 3.43 % and 3.85 % are obtained, respectively from the refinement. Unit cell parameters:  $a = b = 10.39376(42)$ ,  $c = 3.95557(17)$  Å and a unit cell volume of  $370.071(26)$  Å<sup>3</sup>. Black marks, red line, blue line indicate experimentally observed intensities, calculated intensities and difference respectively.

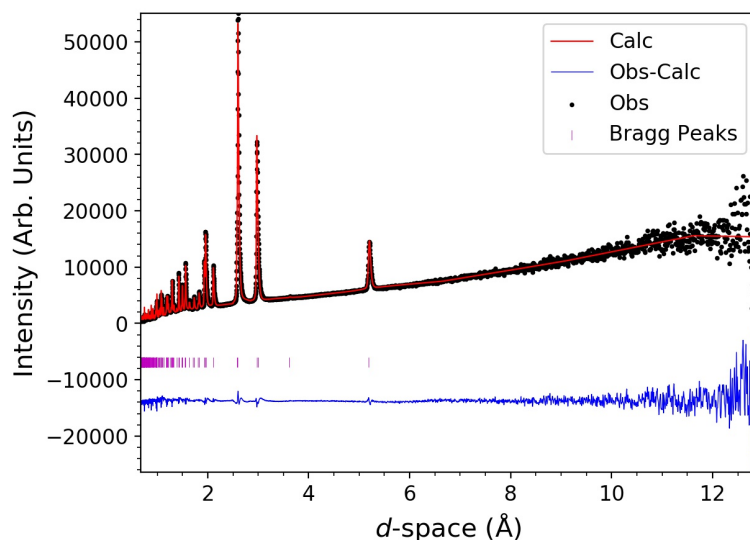

Supplementary Figure 17: Powder neutron diffraction pattern of  $\text{Dy}(\text{DCO}_2)_3$  at 100 K using bank 2+9 of the WISH diffractometer, fitted using the Rietveld method with the  $R3m$  space group.  $R_p$  and  $R_{wp}$  of 5.24 % and 8.40 % are obtained, respectively from the refinement. Unit cell parameters:  $a = b = 10.39376(42)$ ,  $c = 3.95557(17)$  Å and a unit cell volume of  $370.071(26)$  Å<sup>3</sup>. Black marks, red line, blue line indicate experimentally observed intensities, calculated intensities and difference respectively.

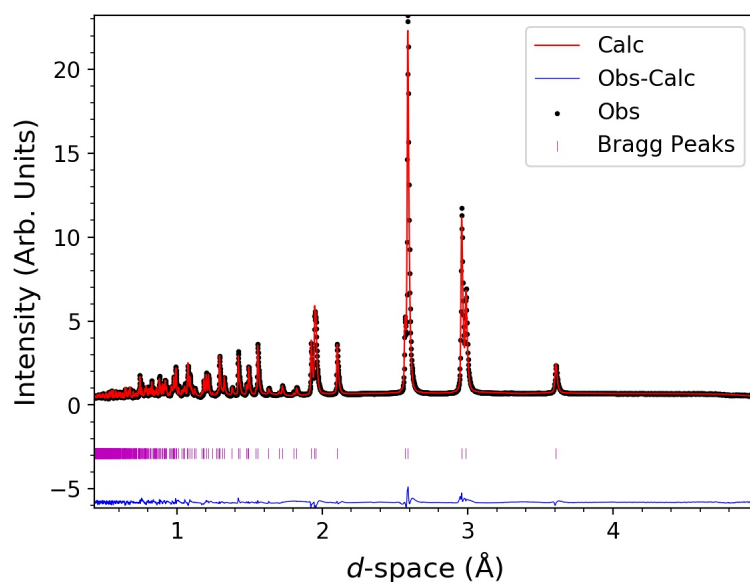

Supplementary Figure 18: Powder neutron diffraction pattern of  $\text{Ho}(\text{DCO}_2)_3$  at 1.5 K using bank 5+6 of the WISH diffractometer, fitted using the Rietveld method with the  $R3m$  space group.  $R_p$  and  $R_{wp}$  of 4.22 % and 4.74 % are obtained, respectively from the refinement. Unit cell parameters:  $a = b = 10.36026(30)$ ,  $c = 3.94188(12)$  Å and a unit cell volume of  $366.416(19)$  Å<sup>3</sup>. Black marks, red line, blue line indicate experimentally observed intensities, calculated intensities and difference respectively.

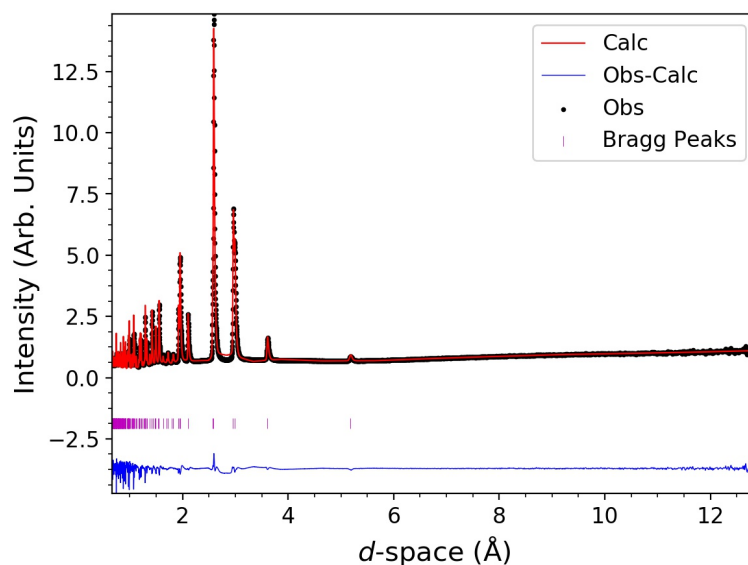

Supplementary Figure 19: Powder neutron diffraction pattern of  $\text{Ho}(\text{DCO}_2)_3$  at 1.5 K using bank 2+9 of the WISH diffractometer, fitted using the Rietveld method with the  $R3m$  space group.  $R_p$  and  $R_{wp}$  of 6.30 % and 3.32 % are obtained, respectively from the refinement. Unit cell parameters:  $a = b = 10.36026(30)$ ,  $c = 3.94188(12)$  Å and a unit cell volume of  $366.416(19)$  Å<sup>3</sup>. Black marks, red line, blue line indicate experimentally observed intensities, calculated intensities and difference respectively.

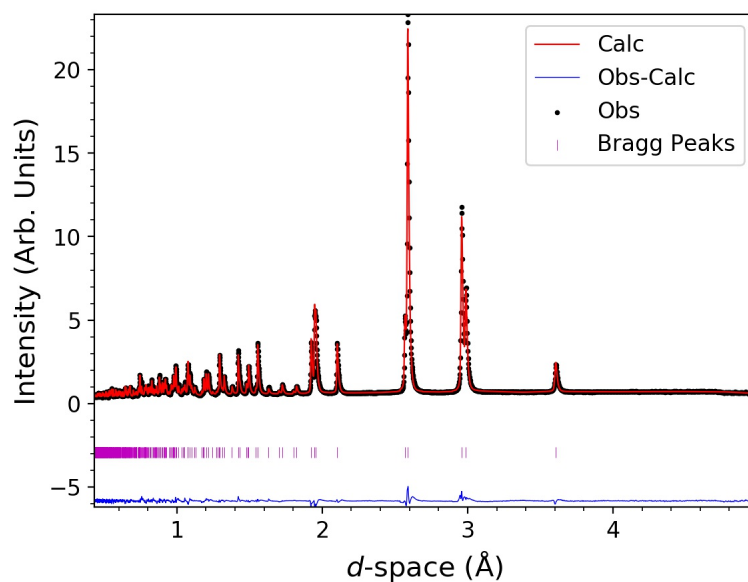

Supplementary Figure 20: Powder neutron diffraction pattern of  $\text{Ho}(\text{DCO}_2)_3$  at 40 K using bank 5+6 of the WISH diffractometer, fitted using the Rietveld method with the  $R3m$  space group.  $R_p$  and  $R_{wp}$  of 4.05 % and 4.51 % are obtained, respectively from the refinement. Unit cell parameters:  $a = b = 10.36116(36)$ ,  $c = 3.94220(15)$  Å and a unit cell volume of  $366.510(22)$  Å<sup>3</sup>. Black marks, red line, blue line indicate experimentally observed intensities, calculated intensities and difference respectively.

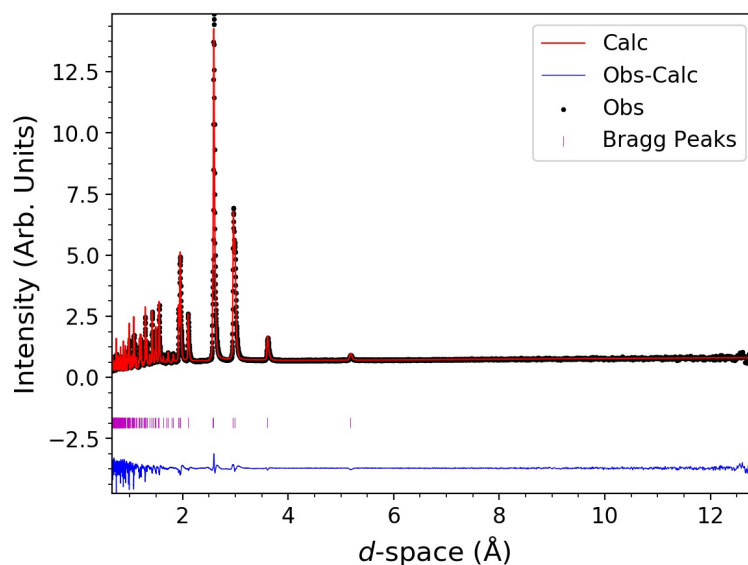

Supplementary Figure 21: Powder neutron diffraction pattern of  $\text{Ho}(\text{DCO}_2)_3$  at 40 K using bank 2+9 of the WISH diffractometer, fitted using the Rietveld method with the  $R3m$  space group.  $R_p$  and  $R_{wp}$  of 6.24 % and 3.61 % are obtained, respectively from the refinement. Unit cell parameters:  $a = b = 10.36116(36)$ ,  $c = 3.94220(15)$  Å and a unit cell volume of  $366.510(22)$  Å<sup>3</sup>. Black marks, red line, blue line indicate experimentally observed intensities, calculated intensities and difference respectively.

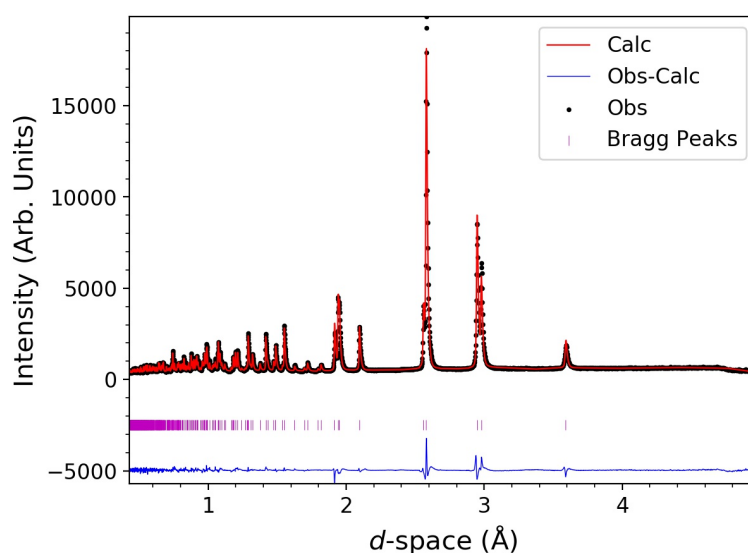

Supplementary Figure 22: Powder neutron diffraction pattern of  $\text{Er}(\text{DCO}_2)_3$  at 1.5 K using bank 5+6 of the WISH diffractometer, fitted using the Rietveld method with the  $R3m$  space group.  $R_p$  and  $R_{wp}$  of 4.67 % and 5.50 % are obtained, respectively from the refinement. Unit cell parameters:  $a = b = 10.33911(44)$ ,  $c = 3.93030(18)$  Å and a unit cell volume of  $363.850(27)$  Å<sup>3</sup>. Black marks, red line, blue line indicate experimentally observed intensities, calculated intensities and difference respectively.

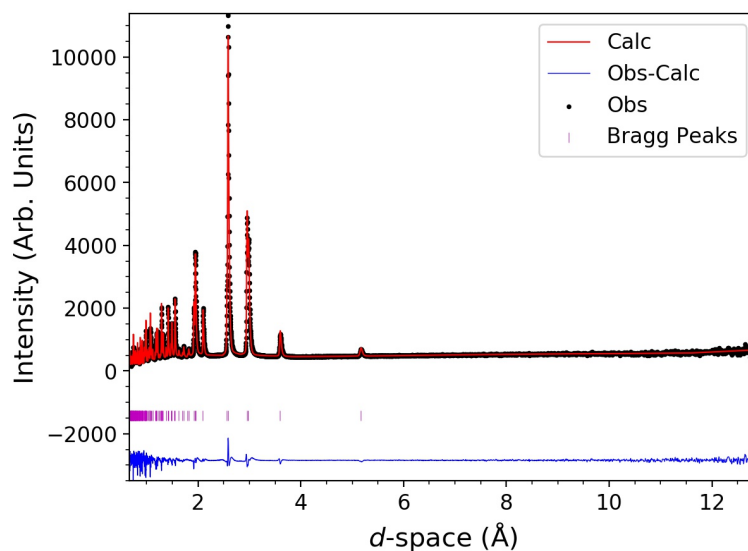

Supplementary Figure 23: Powder neutron diffraction pattern of  $\text{Er}(\text{DCO}_2)_3$  at 1.5 K using bank 2+9 of the WISH diffractometer, fitted using the Rietveld method with the  $R\bar{3}m$  space group.  $R_p$  and  $R_{wp}$  of 6.31 % and 4.21 % are obtained, respectively from the refinement. Unit cell parameters:  $a = b = 10.33911(44)$ ,  $c = 3.93030(18)$  Å and a unit cell volume of  $363.850(27)$  Å<sup>3</sup>. Black marks, red line, blue line indicate experimentally observed intensities, calculated intensities and difference respectively.

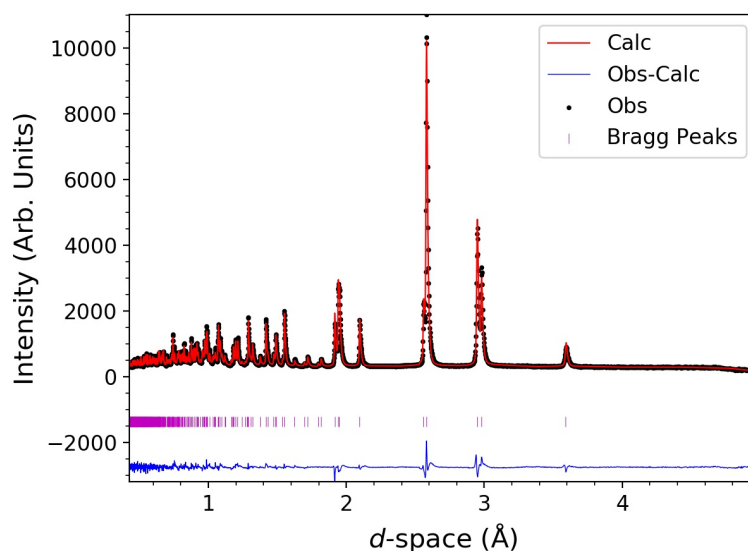

Supplementary Figure 24: Powder neutron diffraction pattern of  $\text{Er}(\text{DCO}_2)_3$  at 20 K using bank 5+6 of the WISH diffractometer, fitted using the Rietveld method with the  $R\bar{3}m$  space group.  $R_p$  and  $R_{wp}$  of 5.18 % and 5.64 % are obtained, respectively from the refinement. Unit cell parameters:  $a = b = 10.33991(48)$ ,  $c = 3.93033(19)$  Å and a unit cell volume of  $363.909(30)$  Å<sup>3</sup>. Black marks, red line, blue line indicate experimentally observed intensities, calculated intensities and difference respectively.

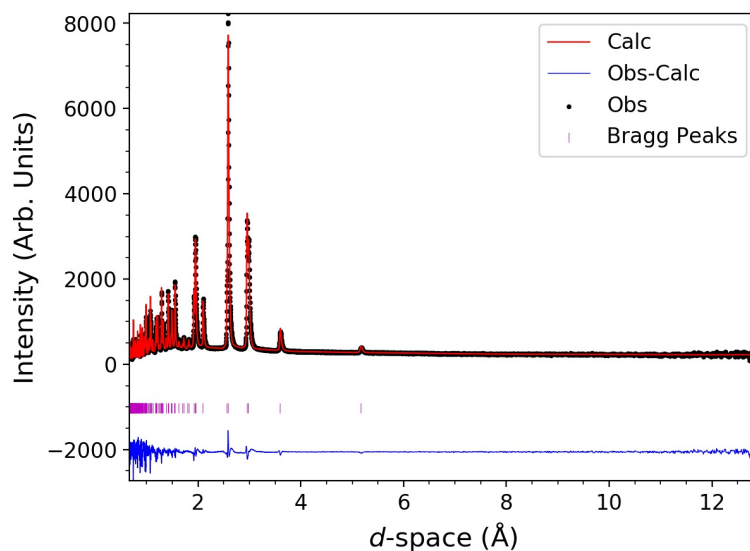

Supplementary Figure 25: Powder neutron diffraction pattern of  $\text{Er}(\text{DCO}_2)_3$  at 20 K using bank 2+9 of the WISH diffractometer, fitted using the Rietveld method with the  $R\bar{3}m$  space group.  $R_p$  and  $R_{wp}$  of 7.75 % and 4.95 % are obtained, respectively from the refinement. Unit cell parameters:  $a = b = 10.33991(48)$ ,  $c = 3.93033(19)$  Å and a unit cell volume of  $363.909(30)$  Å<sup>3</sup>. Black marks, red line, blue line indicate experimentally observed intensities, calculated intensities and difference respectively.

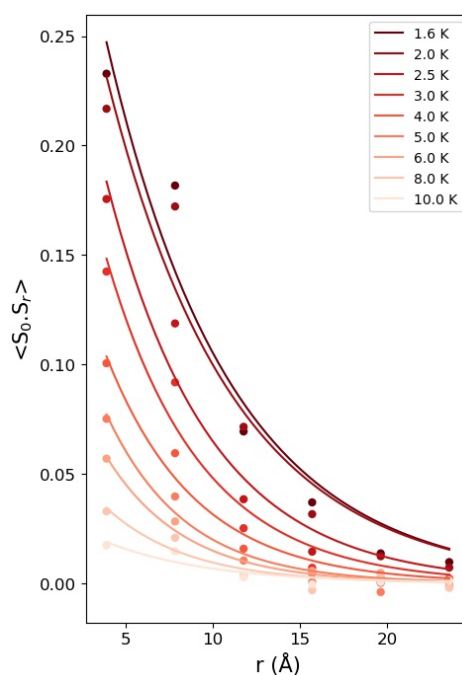

Supplementary Figure 26: Correlation length fits at various temperatures

© The Authors under the terms of the Creative Commons Attribution License  
<http://creativecommons.org/licenses/by/3.0/>, which permits unrestricted use, provided the  
 original author and source are credited.
